# Supplementary material
Source: publisher figshare collection journal article supplement (https://acs.figshare.com/ndownloader/files/4579519)

# Supplementary Material

Deviations Between the  
Experimental Pendant-Bubble  
Dynamic Surface Tension Data  
and the Diffusion-Controlled Model Fits

# Three Features Suggesting the Possible Existence of Convective Currents at Time Scales Greater than 100 Seconds

- **Feature 1:** Whenever a significant percentage reduction in the dynamic surface tension takes place at time scales *smaller than 100 seconds*, there is good agreement between the experimental pendant-bubble dynamic surface tension (DST) data and the diffusion-controlled model fits.
- **Feature 2:** Whenever a significant percentage reduction in the dynamic surface tension takes place at time scales *greater than 100 seconds* (indicated by the **yellow regions**), there is relatively poor agreement between the experimental pendant-bubble DST data and the diffusion-controlled model fits.
- **Feature 3:** Whenever a significant reduction in the dynamic surface tension takes place at time scales *greater than 100 seconds* (indicated by the **yellow regions**), the experimental DST data reduces at a rate which is faster than that predicted by the diffusion-controlled model at long times (indicated by the **blue** colored ovals).

Percentage Reduction in the  
Dynamic Surface Tension:

$$\frac{\gamma_{w/a} - \gamma(t)}{\gamma_{w/a} - \gamma_e} \times 100$$

$\gamma_{w/a}$  Water/air surface tension

$\gamma(t)$  Instantaneous surface tension at time  $t$

$\gamma_e$  Equilibrium surface tension

Surfactant:

Decanol

Equilibrium Adsorption

Model Used:

Phase Transition Model

Reference:

S-Y. Lin, K. Mckeigue, and C. Maldarelli,  
Langmuir, 7, 1055-1066, 1991.

## Adapted from Figure 3

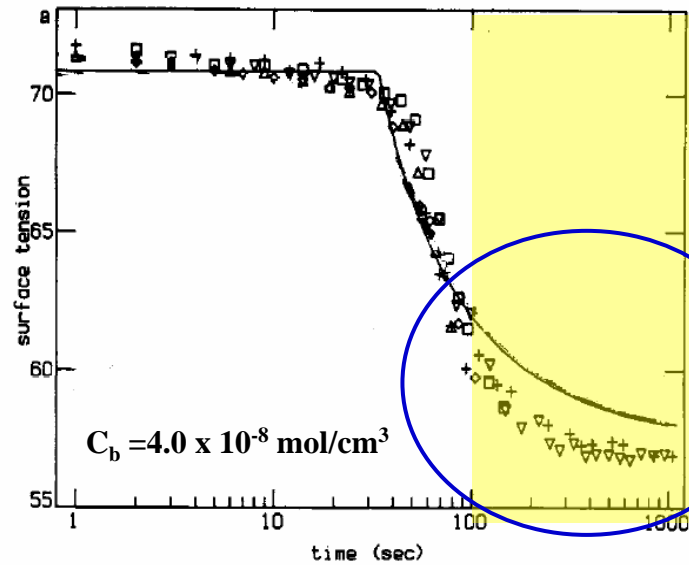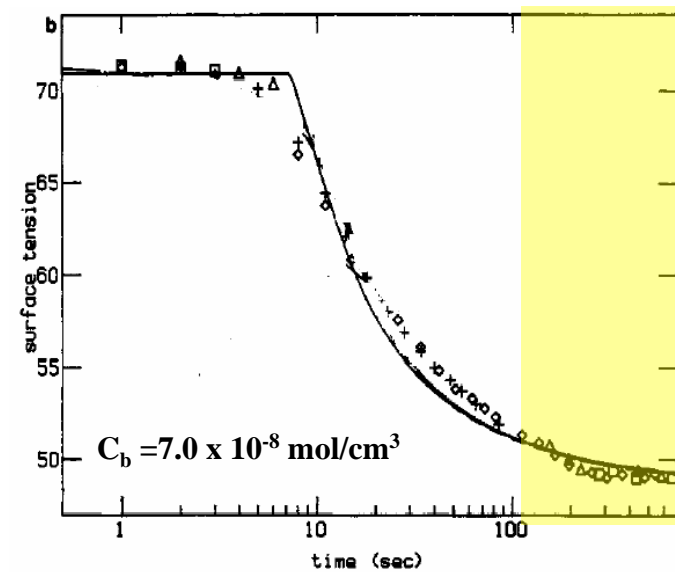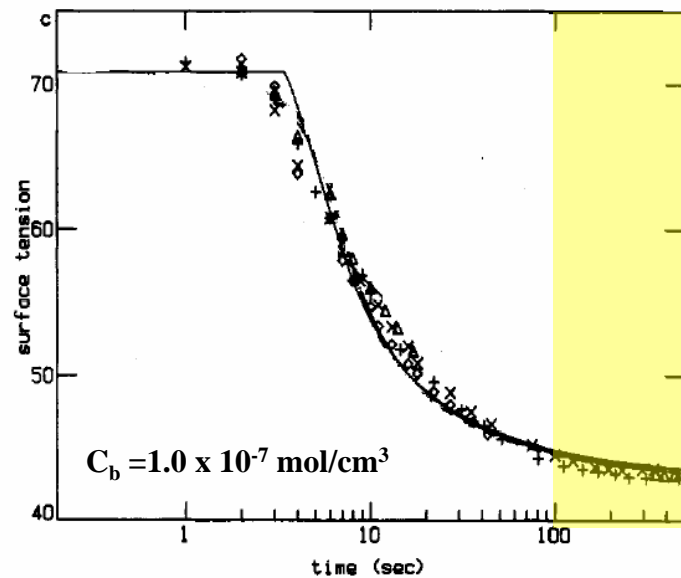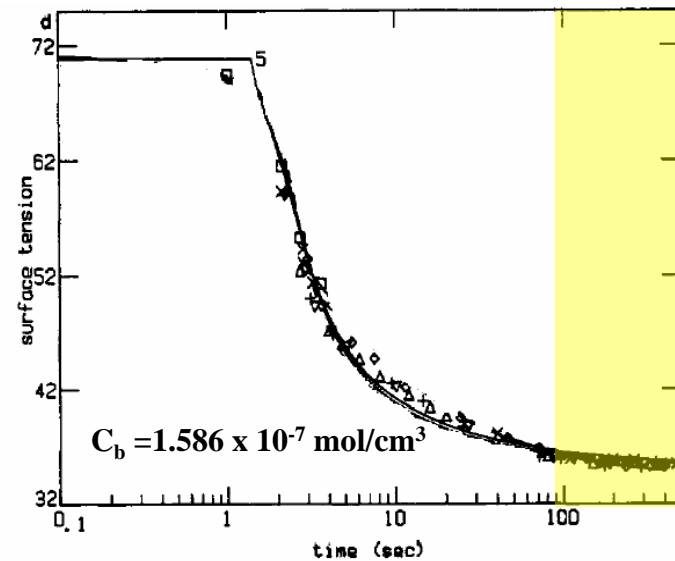

Surfactant:

Decanol

Equilibrium Adsorption

Model Used:

Generalized Frumkin Model

Reference:

S-Y. Lin, T-L. Lu, and W-B. Hwang,  
Langmuir, 11, 555-562, 1995.

# Adapted from Figure 3

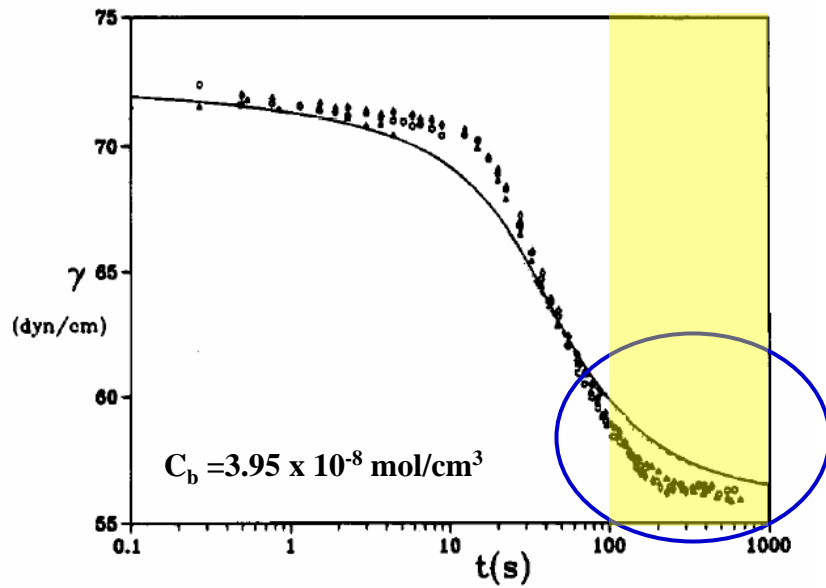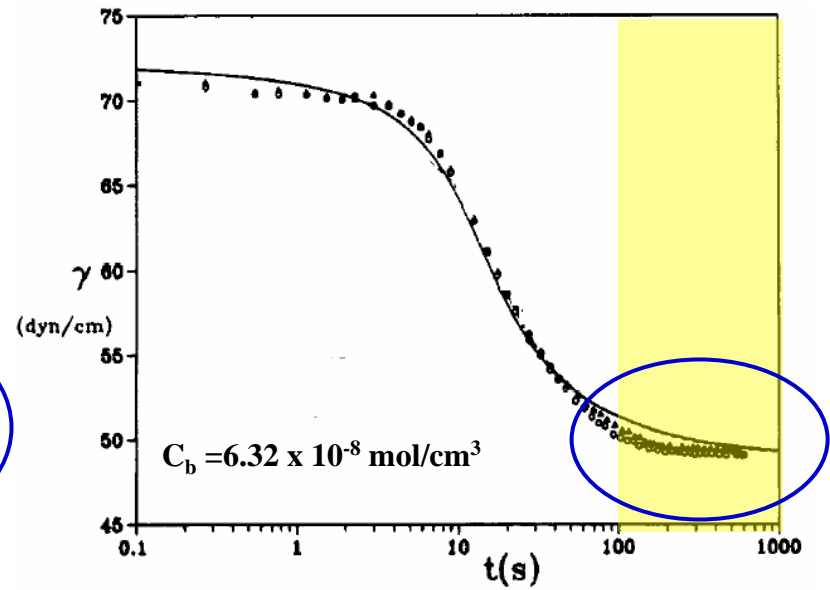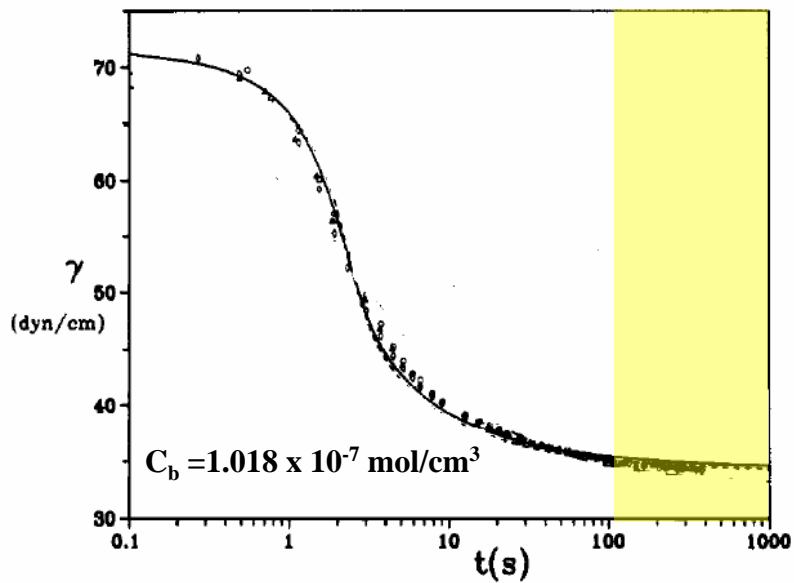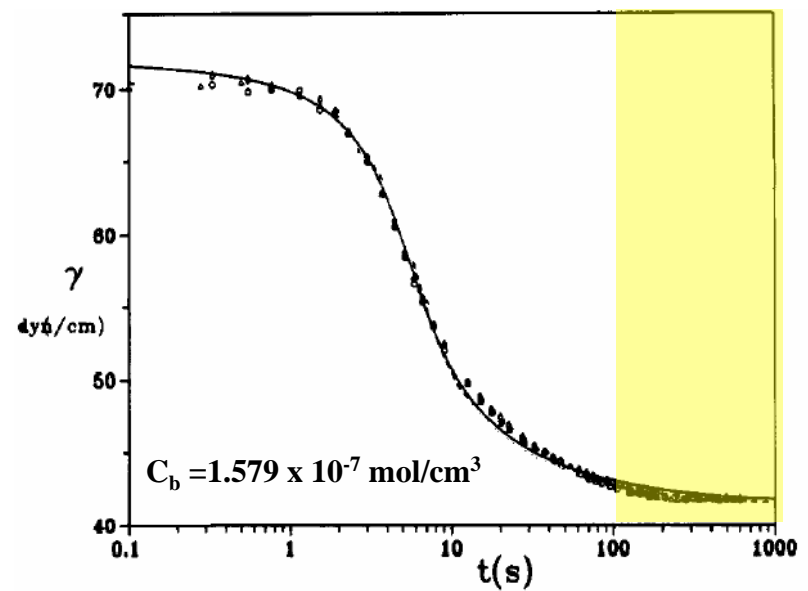

Surfactant:

Nonanol

Equilibrium Adsorption

Model Used:

Generalized Frumkin Model

Reference:

Y-C. Lee, Y-B. Liou, R. Miller, H-S. Liu,  
and S-Y. Lin, Langmuir, 11, 555-562,  
1995.

## Adapted from Figure 7

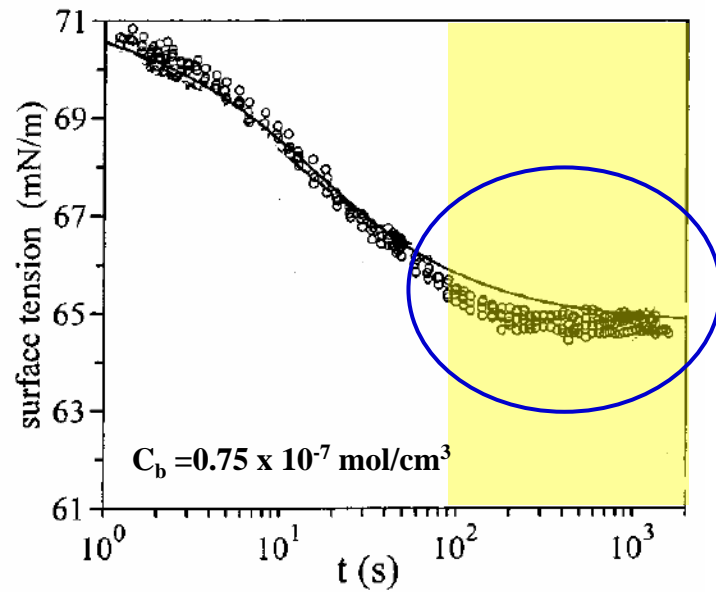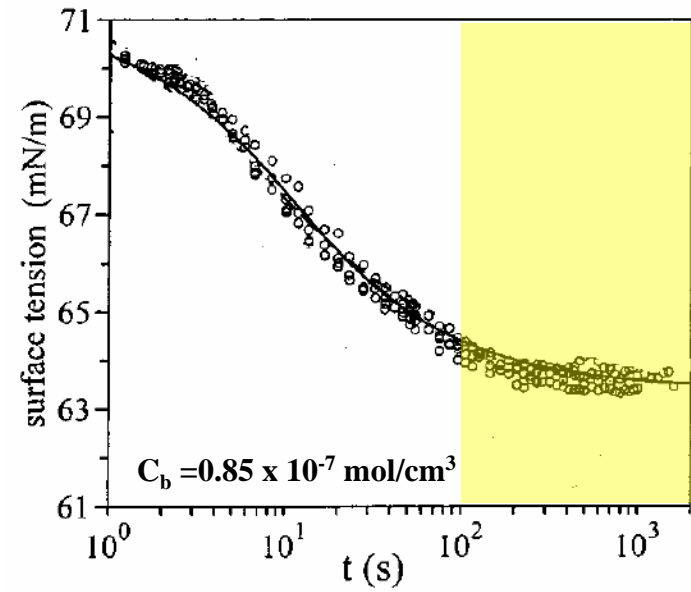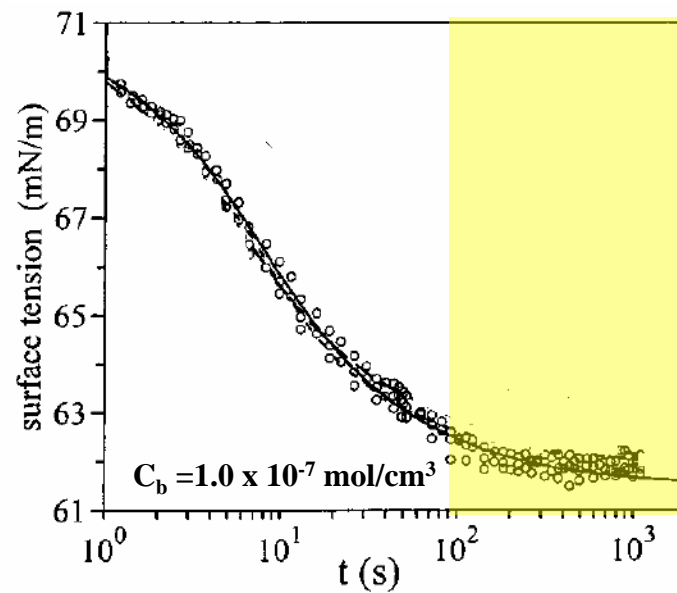



Surfactant:

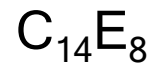

Equilibrium Adsorption

Model Used:

Generalized Frumkin Model

Reference:

Y-C. Lee, K. J. Stebe, H-S. Liu, and  
S-Y. Lin, Colloids and Surfaces A:  
Physicochem. Eng. Aspects, 220,  
139-150, 2003.

Adapted from Figure 5b

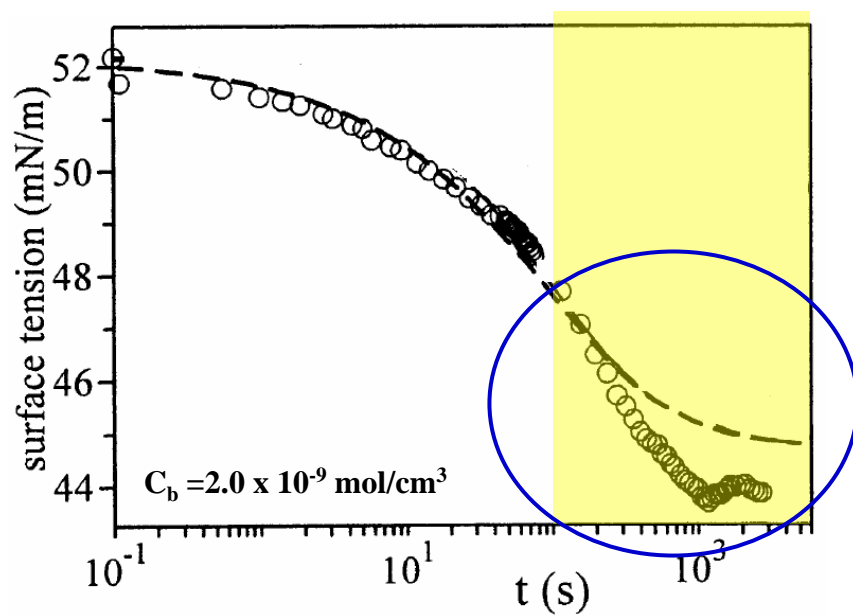

Adapted from Figure 10b

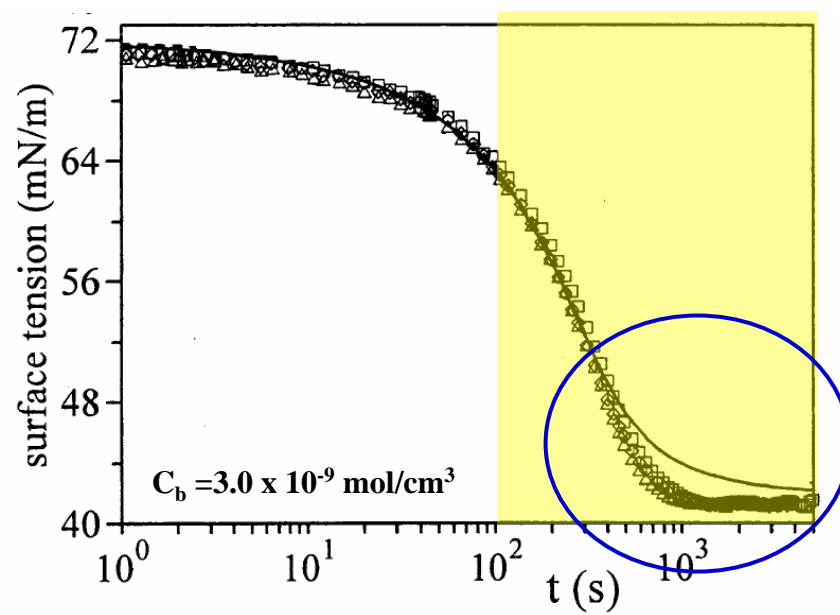

Surfactant:

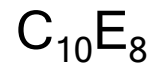

Equilibrium Adsorption

Model Used:

Generalized Frumkin Model

Reference:

H-C. Chang, C-T. Hsu, and S-Y. Lin,  
Langmuir, 14, 2476-2484, 2003.

Adapted from Figure 2

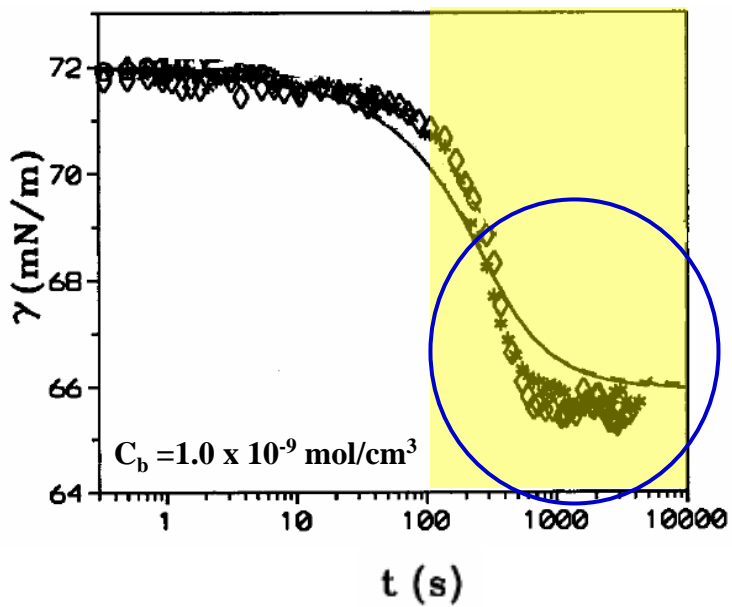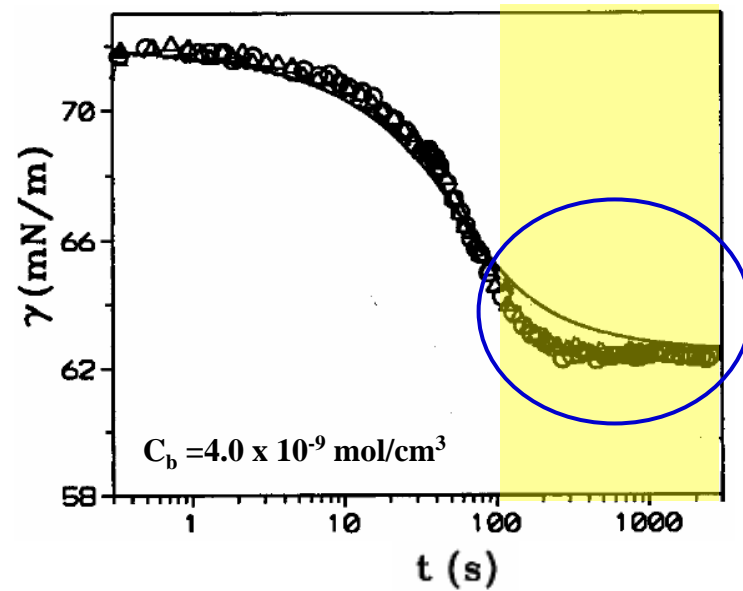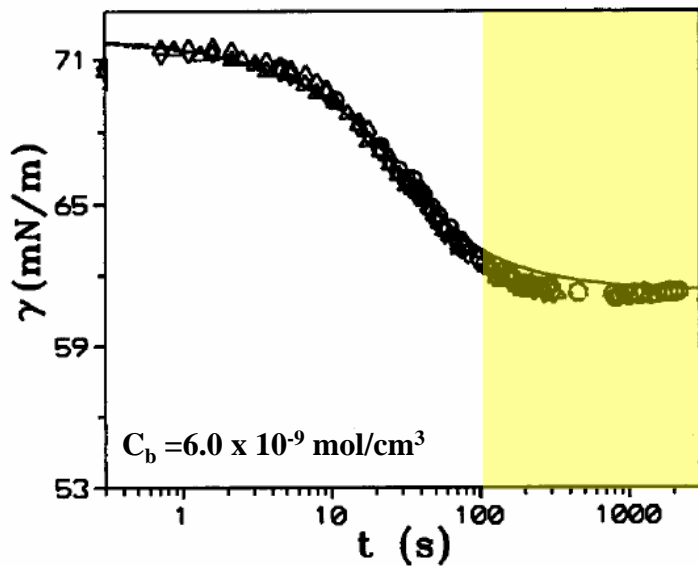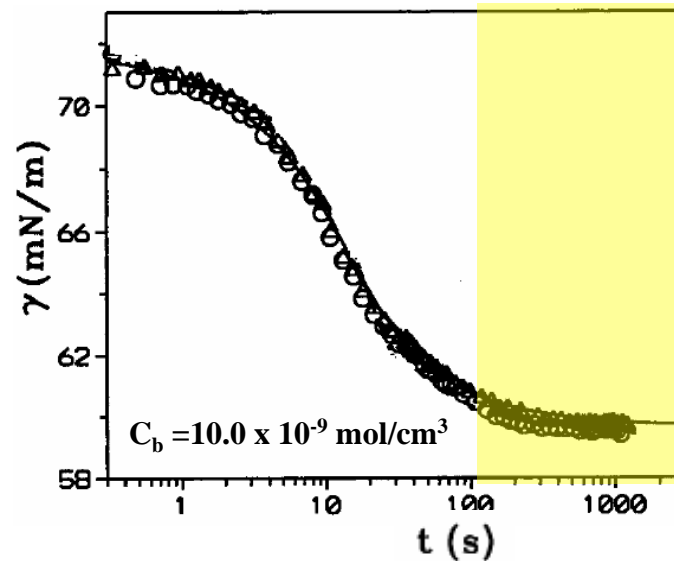

Surfactant:

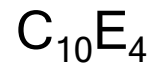

Equilibrium Adsorption

Model Used:

Generalized Frumkin Model

Reference:

Y-C. Lee, H-S. Liu, and S-Y. Lin,  
Colloids and Surfaces A: Physicochem.  
Eng. Aspects, 212, 123-134, 2003.

## Adapted from Figure 8

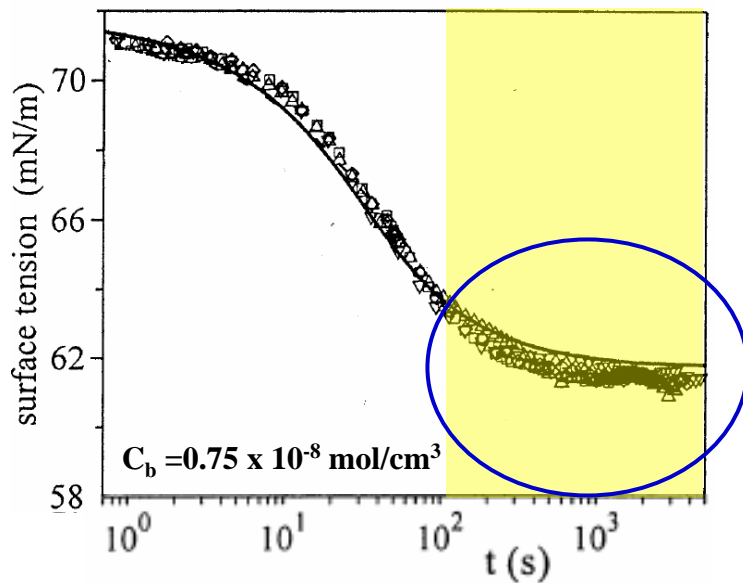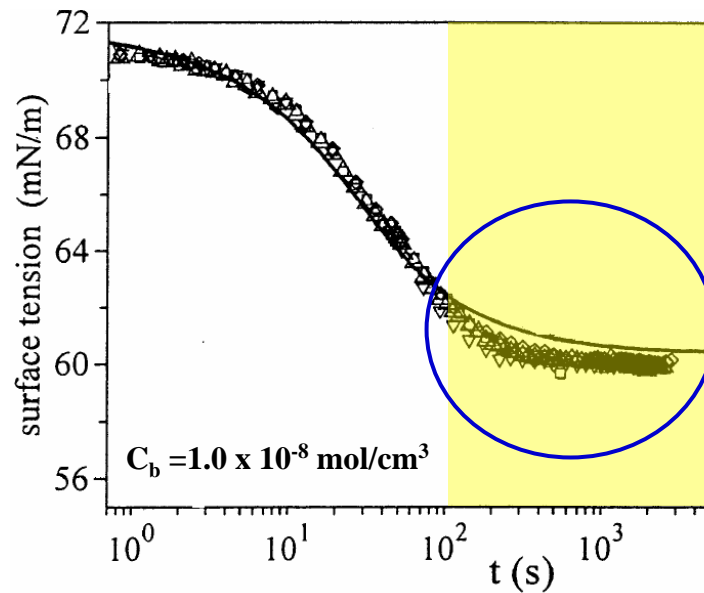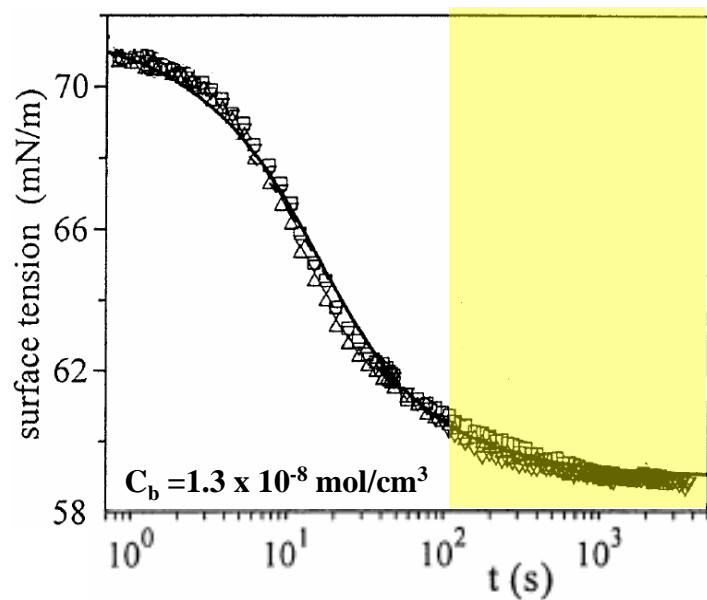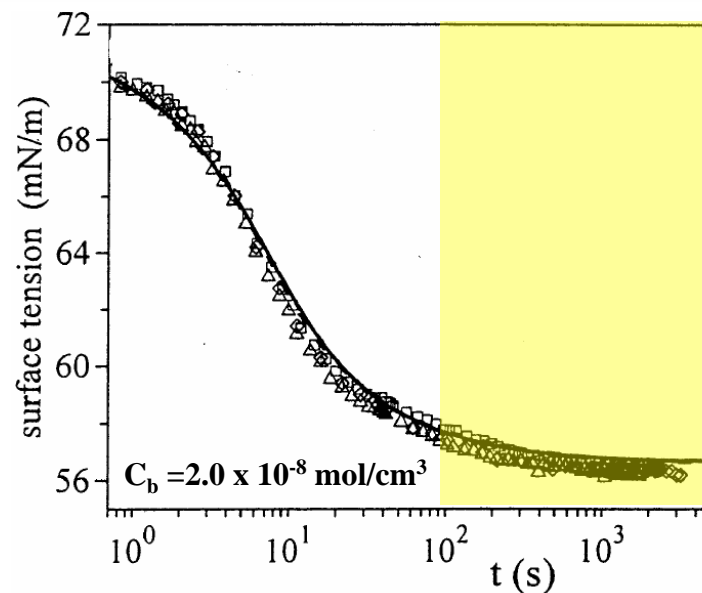

Surfactant:  
Equilibrium Adsorption

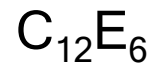

Model Used:

Frumkin Model

Reference:

R. Pan, J. Green, and C. Maldarelli,  
Journal of Colloid and Interface Science,  
205, 213-230, 1998.

Adapted from Figure 11

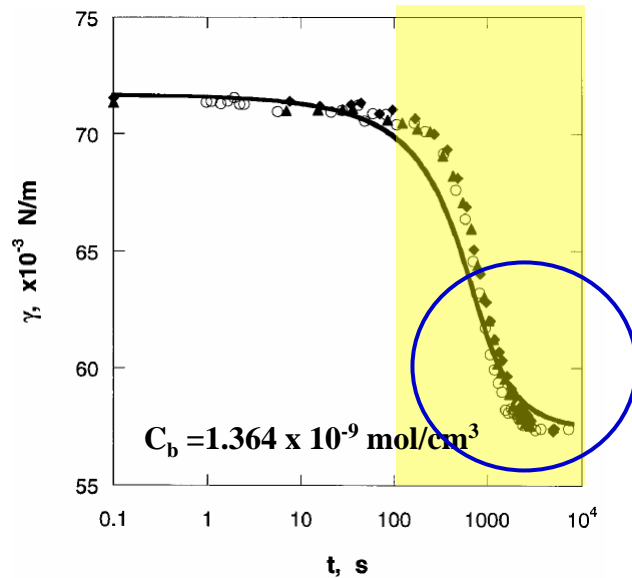

Adapted from Figure 12

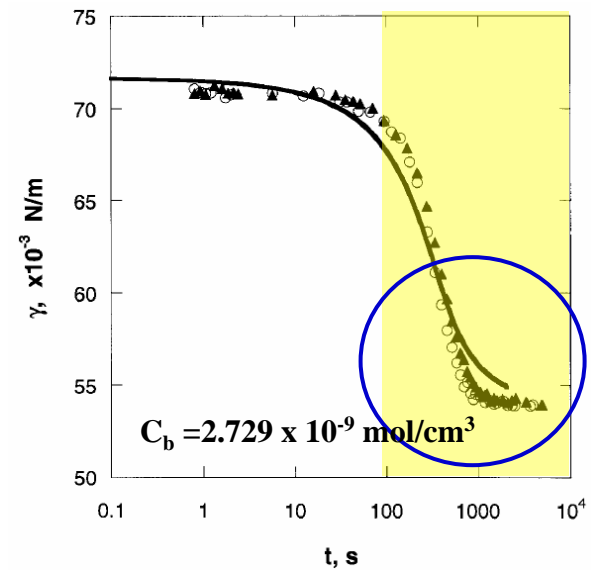

Adapted from Figure 13

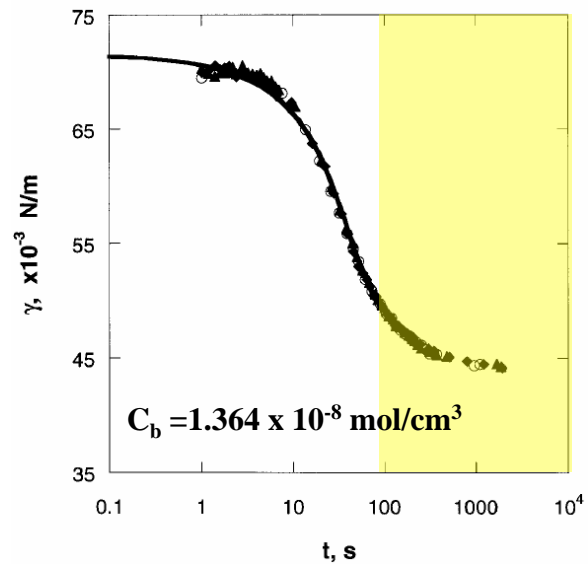

Adapted from Figure 14

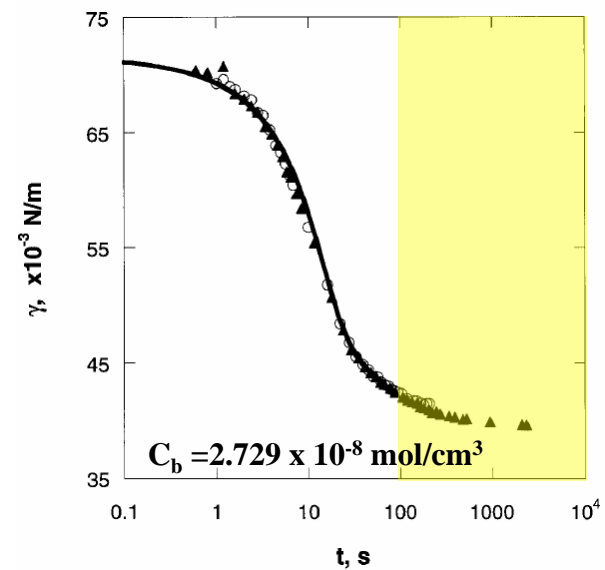

Supplement: Supplementary file 1 [file 4579519]
